# Supplementary material for: PIEZO1 and TRPV4, which Are Distinct Mechano-Sensors in the Osteoblastic MC3T3-E1 Cells, Modify Cell-Proliferation
Source: MDPI journal article supplement (doi:10.3390/ijms20194960), 2019-10-08
Supplement: s1 [file s1]

# PIEZO1 and TRPV4, which Are Distinct Mechano-Sensors in the Osteoblastic MC3T3-E1 Cells, Modify Cell-Proliferation

Maki Yoneda <sup>1,2</sup>, Hiroka Suzuki <sup>1</sup>, Noriyuki Hatano <sup>1</sup>, Sayumi Nakano <sup>1</sup>, Yukiko Muraki <sup>1</sup>, Ken Miyazawa <sup>2</sup>, Shigemi Goto <sup>2</sup> and Katsuhiko Muraki <sup>1,\*</sup>

<sup>1</sup> Laboratory of Cellular Pharmacology, School of Pharmacy, Aichi Gakuin University, 1-100 Kusumoto, Chikusa, Nagoya 464-8650, Japan

<sup>2</sup> Department of Orthodontics, School of Dentistry, Aichi Gakuin University, Nagoya 464-8650, Japan

\* Correspondence: kmuraki@dpc.agu.ac.jp, Tel: +81-52-757-6788

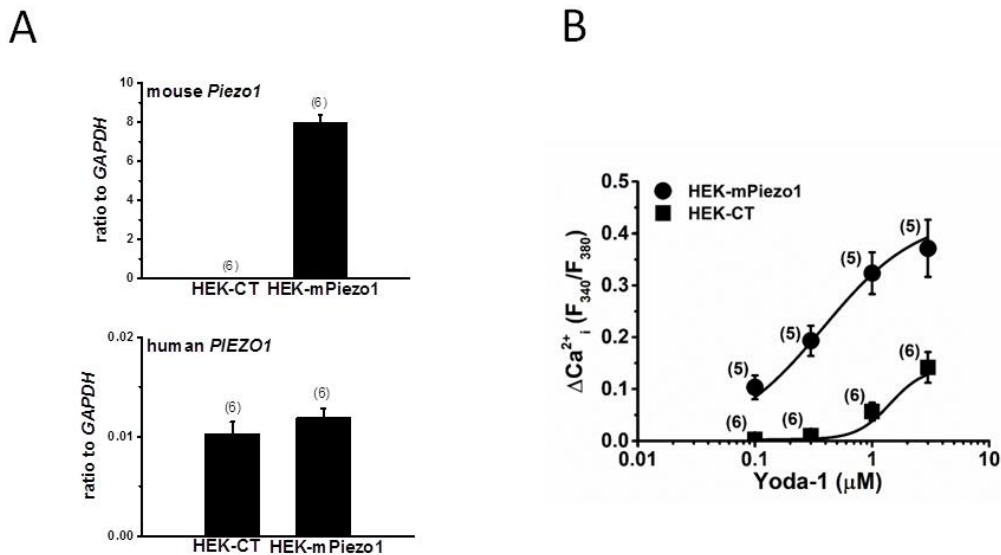

**Figure S1.** PIEZO channel expression and effects of Yoda1 on HEK-CT and HEK-mPiezo1 cells. (A) The quantitative mRNA expression of mouse *Piezo1* and human *PIEZO1* was determined in HEK-CT and HEK-mPiezo1 cells. (B) To functionally confirm the basal expression of PIEZO1 in HEK-CT cells, Yoda1 applied to HEK-CT cells. The peak change in  $Ca^{2+}$  response to Yoda1 ( $\Delta Ca^{2+}_i (F_{340}/F_{380})$ ) was summarized and a set of data was fitted with a concentration-response relationship. The same data sets in Fig.2A were used for HEK-mPiezo1 cells. Pooled data were averaged and expressed as mean  $\pm$  SEM. The numbers in parentheses indicate the number of independent experiments.

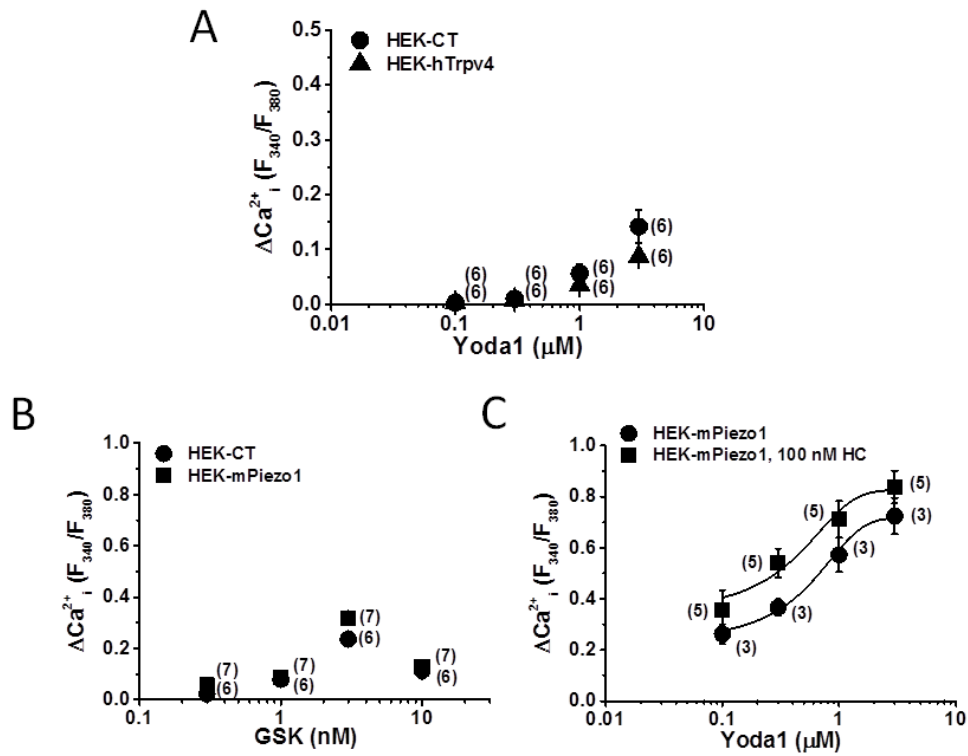

**Figure S2.** Selectivity of Yoda1, GSK, and HC against TRPV4 (A), PIEZO1 (B), and Yoda1-induced PIEZO1 response (C), respectively, was tested and the peak change in each  $Ca^{2+}_i$  response ( $\Delta Ca^{2+}_i (F_{340}/F_{380})$ ) was summarized as a concentration response relationship. A set of data (C) was fitted with a concentration-response relationship. Pooled data were averaged and expressed as mean  $\pm$  SEM. The numbers in parentheses indicate the number of independent experiments.
